# Supplementary material for: Real-world treatment trajectories of adults with newly diagnosed asthma or COPD
Source: PubMed Central journal article supplement (PMC10900306; doi:10.1136/bmjresp-2023-002127), 2024-02-27
Supplement: bmjresp-2023-002127supp001.pdf [file bmjresp-2023-002127supp001.pdf]

**ONLINE SUPPLEMENT****Title**

Real-world treatment trajectories of adults with newly diagnosed asthma or COPD

**Authors**

Aniek F. Markus<sup>1†</sup> MSc,

Peter R. Rijnbeek<sup>1</sup> PhD,

Jan A. Kors<sup>1</sup> PhD,

Edward Burn<sup>2,3</sup> DPhil,

Talita Duarte-Salles<sup>3</sup> MPH, PhD,

Markus Haug<sup>4</sup>,

Chungsoo Kim<sup>5</sup> PharmD,

Raivo Kolde<sup>4</sup>, PhD,

Youngsoo Lee<sup>6</sup>, MD,

Hae-Sim Park<sup>6</sup>, MD, PhD,

Rae Woong Park<sup>5</sup> MD, PhD,

Daniel Prieto-Alhambra<sup>1,2</sup> MD, PhD,

Carlen Reyes<sup>3</sup>, MD

Jerry A. Krishnan<sup>7</sup>, MD, PhD

Guy G. Brusselle<sup>8,9</sup> MD, PhD,\*

Katia M.C. Verhamme<sup>1,10</sup> MD, PhD\*

\*Both authors contributed equally to the supervision of the research work and manuscript.

**TABLE OF CONTENTS**

|                                                                                 |                  |
|---------------------------------------------------------------------------------|------------------|
| <b><u>ONLINE SUPPLEMENT 1 – ADDITIONAL DATABASE INFORMATION .....</u></b>       | <b><u>3</u></b>  |
| <b><u>ONLINE SUPPLEMENT 2 – STUDY POPULATIONS .....</u></b>                     | <b><u>7</u></b>  |
| <b><u>ONLINE SUPPLEMENT 3 – RESPIRATORY DRUG CLASSES .....</u></b>              | <b><u>18</u></b> |
| <b><u>ONLINE SUPPLEMENT 4 – BASELINE CHARACTERISTICS .....</u></b>              | <b><u>25</u></b> |
| <b><u>ONLINE SUPPLEMENT 5 – STUDY SETTINGS TREATMENT TRAJECTORIES .....</u></b> | <b><u>26</u></b> |
| <b><u>ONLINE SUPPLEMENT 6 – STEP-WISE TREATMENT .....</u></b>                   | <b><u>27</u></b> |
| <b><u>ONLINE SUPPLEMENT 7 – RESULTS TREATMENT STEP-UP/STEP-DOWN .....</u></b>   | <b><u>36</u></b> |
| <b><u>ONLINE SUPPLEMENT 8 – SENSITIVITY ANALYSIS .....</u></b>                  | <b><u>38</u></b> |
| <b><u>ONLINE SUPPLEMENT 9 – POOLED RESULTS .....</u></b>                        | <b><u>43</u></b> |
| <b><u>REFERENCES .....</u></b>                                                  | <b><u>44</u></b> |

### Online Supplement 1 – Additional database information

#### List of descriptions:

- IBM MarketScan Commercial Claims and Encounters (CCAЕ), United States

This database contains data from individuals enrolled in United States employer-sponsored insurance health plans, for example, employees, their spouses, and dependents. The data include inpatient and outpatient medical claims, diagnosis codes, and outpatient pharmacy dispensing claims. The patients in CCAЕ are between 0 and 65 years of age. Additionally, it captures laboratory test results for a subset of the covered population. This administrative claims database includes a variety of fee-for-service, preferred provider organizations, and capitated health plans. The database covers the period January 2000 until May 2021.

- IBM MarketScan Multi-State Medicaid (Medicaid), United States

This database contains adjudicated United States health insurance claims for Medicaid (government aided insurance) enrollees from multiple states. It includes hospital discharge diagnoses, outpatient diagnoses and procedures, outpatient pharmacy dispensing claims, as well as ethnicity and Medicare eligibility for enrollees, mostly, under 65 years of age. Members maintain their same identifier even if they leave the system for a brief period however the dataset lacks lab data. The database covers the period January 2006 until January 2021.

- IBM MarketScan Medicare Supplemental (Medicare), United States

This database represents health services of retirees in the United States with primary or Medicare supplemental coverage through privately insured fee-for-service, point-of-service, or capitated health plans. These data include adjudicated health insurance claims (e.g.

inpatient, outpatient, and outpatient pharmacy). Additionally, it captures laboratory tests for a subset of the covered lives. The database covers the period January 2000 until May 2021.

- Estonian Health Insurance Fund (EHIF), Estonia

This database contains claims in national insurer Estonian Health Insurance Fund and its digital prescription service that handles more than 99% of the prescriptions in Estonia. The dataset is obtained according to the University of Tartu ethics committee approval (299/T-21). As the data comes from a national insurer, it represents all Estonian patients at all levels of healthcare. For each patient, there are all the recorded ICD-10 diagnosis codes from the insurance claims and all prescriptions showing ATC codes for active ingredient together with prescription and dispensation times. The database covers the period January 2011 until December 2019.

- Clinical Practice Research Datalink (CPRD), United Kingdom

This database is a governmental, not-for-profit research service, jointly funded by the NHS National Institute for Health Research (NIHR) and the Medicines and Healthcare products Regulatory Agency (MHRA), a part of the Department of Health, United Kingdom (UK). CPRD consists of data collected from UK primary care for all ages. This includes conditions, observations, measurements, and procedures that the general practitioner is made aware of in addition to any prescriptions as prescribed by the general practitioner. In addition to primary care, there are also linked secondary care records for a small number of people. The major data elements contained within this database are outpatient prescriptions given by the general practitioner (coded with Multilex codes) and outpatient clinical, referral,

immunization or test events that the general practitioner knows about (coded in Read or ICD10 or LOINC codes). The database also contains the patients' year of births and any date of deaths. The database covers the period January 1995 until July 2020.

- Supplemental Database Information System for Research in Primary Care (SIDIAPI), Spain

This primary care records database covers approximately 80% of the population of Catalonia, North-East Spain, with data from 328 primary care centres. SIDIAPI was linked to the minimum basic set of hospital discharge data (CMBD-HA), which includes diagnosis and procedures registered during hospital admissions. The database contains information on health conditions as captured via diagnoses registered by healthcare professionals, along with prescriptions made. The database covers the period January 2006 until May 2021.

- Integrated Primary Care Information (IPCI), Netherlands

This database contains longitudinal data of patients of a group of general practitioners (GPs) in The Netherlands. Started in 1992 by the Department of Medical Informatics of the Erasmus University Medical Center, Rotterdam, to enable better post-marketing surveillance of drugs, the IPCI database is used in a large number of studies including drug use, disease prevalence, drug safety and effectiveness studies and methodological research. It consists of 2.5 million patient records, with median follow-up of 4.8 years, and includes patient demographics, information about contacts with GPs, symptoms, diagnoses, laboratory and clinical measurements, prescriptions, and information on use of secondary care. Drugs not prescribed in the GP setting might be underreported. Indications are available as diagnoses by the GPs and, indirectly, from secondary care providers but the

latter might not be complete. The database covers the period January 2006 until August 2020.

- Ajou University School of Medicine (AUSOM), South Korea

This database is a single electronic health record database of Ajou University Medical Center in South Korea. Ajou University Medical Center is a tertiary teaching hospital in South Korea, therefore, most patients are needed professional care from medical specialists. Most patients have to visit this tertiary center with a medical request form written from the primary or secondary institutions according to the healthcare system of South Korea. The AUSOM data includes diagnoses, medications, lab tests, surgeries and procedures, observations, and visit records. All prescribing includes outpatient and inpatient prescriptions. The database covers the period January 1994 until June 2020.

Table E1: Strengths and limitations of data types included in this study

| Data type     | Drug data          | Strengths                           | Limitations/biases                                                                                          |
|---------------|--------------------|-------------------------------------|-------------------------------------------------------------------------------------------------------------|
| EHR, GP       | Drug prescriptions | Information on prescribing patterns | Overestimation of actual treatment due to primary non-adherence and lack of information on treatment intake |
| EHR, Hospital | Drug prescriptions | Information on prescribing patterns | Overestimation of actual treatment due to primary non-adherence and lack of information on treatment intake |
| Claims        | Drug dispensing    | Information on filled prescriptions | Overestimation of actual treatment due to lack of information on treatment intake                           |

### Online Supplement 2 – Study populations

#### *i) Asthma*

##### Initial Event Cohort:

People with continuous observation of 365 days before and 1,095 days after event may enter the cohort when observing any of the following:

- Condition occurrence of Asthma\* for the first time in the person's history.

##### Inclusion Criteria:

- Age  $\geq$  18 years AND,
- No condition occurrences of COPD\*\* in their history or during follow-up time AND,
- Index date after December 31, 2009 and before December 31, 2019.

Cohort Exit: the person exits the cohort at the end of continuous observation.

#### *ii) COPD*

##### Initial Event Cohort:

People with continuous observation of 365 days before and 1,095 days after event may enter the cohort when observing any of the following:

- Condition occurrence of COPD\*\* for the first time in the person's history.

##### Inclusion Criteria:

- Age  $\geq$  40 years AND,
- No condition occurrences of Asthma\* in their history or during follow-up time AND,
- Index date after December 31, 2009 and before December 31, 2019.

Cohort Exit: the person exits the cohort at the end of continuous observation.

Table E2: Number of patients per year with asthma.

| Characteristic | CAAE<br>(United<br>States) | Medicaid<br>(United<br>States) | Medicare<br>(United<br>States) | EHIF<br>(Estonia) | CPRD<br>(United<br>Kingdom) | SIDIAP<br>(Spain) | IPCI<br>(Nether<br>lands) | AUSOM<br>(South<br>Korea) |
|----------------|----------------------------|--------------------------------|--------------------------------|-------------------|-----------------------------|-------------------|---------------------------|---------------------------|
| Year 2010      | 75770                      | 7976                           | 8593                           |                   | 7891                        | 11360             | 929                       | 362                       |
| Year 2011      | 79930                      | 7540                           | 7012                           |                   | 7062                        | 9502              | 908                       | 413                       |
| Year 2012      | 59507                      | 7500                           | 5917                           | 6357              | 7023                        | 10100             | 1250                      | 301                       |
| Year 2013      | 62579                      | 13574                          | 6313                           | 4735              | 6123                        | 11266             | 1474                      | 253                       |
| Year 2014      | 74769                      | 12232                          | 6883                           | 4307              | 5578                        | 10620             | 1545                      | 252                       |
| Year 2015      | 69007                      | 25589                          | 4500                           | 3901              | 4751                        | 9822              | 1705                      | 231                       |
| Year 2016      | 63575                      | 28477                          | 4276                           | 3649              | 4576                        | 8312              | 1941                      | 354                       |
| Year 2017      | 63471                      | 24869                          | 3616                           |                   | 1979                        | 7973              | 1041                      | 258                       |
| Year 2018+     | 24029                      | 46                             | 1434                           |                   |                             | 6133              |                           | 155                       |
| <b>Total</b>   | <b>572,637</b>             | <b>127,803</b>                 | <b>48,544</b>                  | <b>22,949</b>     | <b>44,983</b>               | <b>85,088</b>     | <b>10,793</b>             | <b>2,579</b>              |

Table E3: Number of patients per year with COPD.

| Characteristic | CAAE<br>(United<br>States) | Medicaid<br>(United<br>States) | Medicare<br>(United<br>States) | EHIF<br>(Estonia) | CPRD<br>(United<br>Kingdom) | SIDIAP<br>(Spain) | IPCI<br>(Nether<br>lands) | AUSOM<br>(South<br>Korea) |
|----------------|----------------------------|--------------------------------|--------------------------------|-------------------|-----------------------------|-------------------|---------------------------|---------------------------|
| Year 2010      | 10914                      | 8325                           | 15696                          |                   | 5334                        | 8313              | 509                       | 105                       |
| Year 2011      | 11582                      | 8094                           | 13723                          |                   | 5351                        | 7740              | 540                       | 163                       |
| Year 2012      | 9153                       | 8031                           | 13517                          | 2609              | 4976                        | 9671              | 642                       | 129                       |
| Year 2013      | 8802                       | 14242                          | 13019                          | 2242              | 4177                        | 11023             | 747                       | 116                       |
| Year 2014      | 10507                      | 11815                          | 12324                          | 2136              | 3726                        | 10386             | 749                       | 110                       |
| Year 2015      | 10343                      | 18658                          | 6761                           | 2163              | 3745                        | 9534              | 832                       | 109                       |
| Year 2016      | 10027                      | 22956                          | 6596                           | 2018              | 3655                        | 8230              | 904                       | 139                       |
| Year 2017      | 8966                       | 20920                          | 4623                           |                   | 1567                        | 7365              | 442                       | 98                        |
| Year 2018+     | 3299                       | 77                             | 1420                           |                   |                             | 5067              |                           | 75                        |
| <b>Total</b>   | <b>83,593</b>              | <b>113,118</b>                 | <b>87,679</b>                  | <b>11,168</b>     | <b>32,531</b>               | <b>77,329</b>     | <b>5,365</b>              | <b>1,044</b>              |



Table E4: Code list for asthma\*.

| Concept ID | Name                                           | Class            | Domain ID | Vocabulary |
|------------|------------------------------------------------|------------------|-----------|------------|
| 252658     | Intrinsic asthma without status<br>asthmaticus | Clinical Finding | Condition | SNOMED     |
| 257581     | Exacerbation of asthma                         | Clinical Finding | Condition | SNOMED     |
| 312950     | IgE-mediated allergic asthma                   | Clinical Finding | Condition | SNOMED     |
| 313236     | Cough variant asthma                           | Clinical Finding | Condition | SNOMED     |
| 317009     | Asthma                                         | Clinical Finding | Condition | SNOMED     |
| 443801     | Exercise-induced asthma                        | Clinical Finding | Condition | SNOMED     |
| 761844     | Inhaled steroid-dependent asthma               | Clinical Finding | Condition | SNOMED     |
| 764677     | Persistent asthma                              | Clinical Finding | Condition | SNOMED     |
| 764949     | Persistent asthma, well controlled             | Clinical Finding | Condition | SNOMED     |
| 4015819    | Asthma disturbs sleep weekly                   | Clinical Finding | Condition | SNOMED     |
| 4015947    | Asthma causing night waking                    | Clinical Finding | Condition | SNOMED     |
| 4017025    | Asthma disturbing sleep                        | Clinical Finding | Condition | SNOMED     |
| 4017026    | Asthma not limiting activities                 | Clinical Finding | Condition | SNOMED     |
| 4017182    | Asthma disturbs sleep frequently               | Clinical Finding | Condition | SNOMED     |
| 4017183    | Asthma not disturbing sleep                    | Clinical Finding | Condition | SNOMED     |
| 4017184    | Asthma never disturbs sleep                    | Clinical Finding | Condition | SNOMED     |
| 4017293    | Asthma never restricts exercise                | Clinical Finding | Condition | SNOMED     |
| 4022592    | Millers' asthma                                | Clinical Finding | Condition | SNOMED     |
| 4051466    | Childhood asthma                               | Clinical Finding | Condition | SNOMED     |
| 4075237    | Brittle asthma                                 | Clinical Finding | Condition | SNOMED     |
| 4110051    | Mixed asthma                                   | Clinical Finding | Condition | SNOMED     |
| 4119298    | Late onset asthma                              | Clinical Finding | Condition | SNOMED     |
| 4120261    | Sulfite-induced asthma                         | Clinical Finding | Condition | SNOMED     |
| 4123253    | Hay fever with asthma                          | Clinical Finding | Condition | SNOMED     |
| 4125022    | Acute asthma                                   | Clinical Finding | Condition | SNOMED     |

| Concept ID | Name                                                     | Class            | Domain ID | Vocabulary |
|------------|----------------------------------------------------------|------------------|-----------|------------|
| 4138760    | Exacerbation of intermittent asthma                      | Clinical Finding | Condition | SNOMED     |
| 4141978    | Intermittent asthma                                      | Clinical Finding | Condition | SNOMED     |
| 4142738    | Moderate persistent asthma                               | Clinical Finding | Condition | SNOMED     |
| 4143474    | Bakers' asthma                                           | Clinical Finding | Condition | SNOMED     |
| 4143828    | Mild persistent asthma                                   | Clinical Finding | Condition | SNOMED     |
| 4145356    | Severe persistent asthma                                 | Clinical Finding | Condition | SNOMED     |
| 4145497    | Intrinsic asthma                                         | Clinical Finding | Condition | SNOMED     |
| 4146581    | Mild intermittent asthma                                 | Clinical Finding | Condition | SNOMED     |
| 4152292    | Asthma causes night symptoms 1 to 2<br>times per month   | Clinical Finding | Condition | SNOMED     |
| 4152418    | Asthma never causes daytime symptoms                     | Clinical Finding | Condition | SNOMED     |
| 4152420    | Asthma treatment compliance<br>unsatisfactory            | Clinical Finding | Condition | SNOMED     |
| 4152911    | Asthma causes daytime symptoms most<br>days              | Clinical Finding | Condition | SNOMED     |
| 4152913    | Severe asthma                                            | Clinical Finding | Condition | SNOMED     |
| 4155468    | Mild asthma                                              | Clinical Finding | Condition | SNOMED     |
| 4155469    | Moderate asthma                                          | Clinical Finding | Condition | SNOMED     |
| 4155470    | Occasional asthma                                        | Clinical Finding | Condition | SNOMED     |
| 4155473    | Asthma treatment compliance<br>satisfactory              | Clinical Finding | Condition | SNOMED     |
| 4156136    | Asthma causes daytime symptoms 1 to 2<br>times per month | Clinical Finding | Condition | SNOMED     |
| 4161595    | Asthma daytime symptoms                                  | Clinical Finding | Condition | SNOMED     |
| 4191479    | Allergic asthma                                          | Clinical Finding | Condition | SNOMED     |
| 4191827    | Asthma night-time symptoms                               | Clinical Finding | Condition | SNOMED     |
| 4194289    | Asthma – currently active                                | Clinical Finding | Condition | SNOMED     |

| Concept ID | Name                                                          | Class            | Domain ID | Vocabulary |
|------------|---------------------------------------------------------------|------------------|-----------|------------|
| 4206340    | Asthma without status asthmaticus                             | Clinical Finding | Condition | SNOMED     |
| 4211530    | Wood asthma                                                   | Clinical Finding | Condition | SNOMED     |
| 4212099    | Occupational asthma                                           | Clinical Finding | Condition | SNOMED     |
| 4217558    | Detergent asthma                                              | Clinical Finding | Condition | SNOMED     |
| 4225553    | Cheese-makers' asthma                                         | Clinical Finding | Condition | SNOMED     |
| 4225554    | Isocyanate induced asthma                                     | Clinical Finding | Condition | SNOMED     |
| 4232595    | Platinum asthma                                               | Clinical Finding | Condition | SNOMED     |
| 4245676    | Chemical-induced asthma                                       | Clinical Finding | Condition | SNOMED     |
| 4271333    | Extrinsic asthma without status<br>asthmaticus                | Clinical Finding | Condition | SNOMED     |
| 4279553    | Eosinophilic asthma                                           | Clinical Finding | Condition | SNOMED     |
| 4301938    | Tea-makers' asthma                                            | Clinical Finding | Condition | SNOMED     |
| 4309833    | Non-IgE mediated allergic asthma                              | Clinical Finding | Condition | SNOMED     |
| 4312524    | Substance induced asthma                                      | Clinical Finding | Condition | SNOMED     |
| 35609846   | Life threatening acute exacerbation of<br>extrinsic asthma    | Clinical Finding | Condition | SNOMED     |
| 35609847   | Life threatening acute exacerbation of<br>non-allergic asthma | Clinical Finding | Condition | SNOMED     |
| 36674599   | Asthma never causes night symptoms                            | Clinical Finding | Condition | SNOMED     |
| 36684328   | Acute severe exacerbation of allergic<br>asthma               | Clinical Finding | Condition | SNOMED     |
| 36684335   | Exacerbation of allergic asthma due to<br>infection           | Clinical Finding | Condition | SNOMED     |
| 37108580   | Severe controlled persistent asthma                           | Clinical Finding | Condition | SNOMED     |
| 37108581   | Severe uncontrolled persistent asthma                         | Clinical Finding | Condition | SNOMED     |
| 37109103   | Oral steroid-dependent asthma                                 | Clinical Finding | Condition | SNOMED     |

| Concept ID | Name                                                    | Class            | Domain ID | Vocabulary |
|------------|---------------------------------------------------------|------------------|-----------|------------|
| 37116845   | Acute severe refractory exacerbation of asthma          | Clinical Finding | Condition | SNOMED     |
| 40481763   | Acute exacerbation of chronic asthmatic bronchitis      | Clinical Finding | Condition | SNOMED     |
| 40483397   | Seasonal asthma                                         | Clinical Finding | Condition | SNOMED     |
| 42535716   | Asthma in pregnancy                                     | Clinical Finding | Condition | SNOMED     |
| 42536207   | Life threatening acute exacerbation of asthma           | Clinical Finding | Condition | SNOMED     |
| 42536208   | Moderate acute exacerbation of asthma                   | Clinical Finding | Condition | SNOMED     |
| 42536649   | Uncomplicated non-allergic asthma                       | Clinical Finding | Condition | SNOMED     |
| 42538744   | Exacerbation of allergic asthma                         | Clinical Finding | Condition | SNOMED     |
| 42539549   | Uncomplicated allergic asthma                           | Clinical Finding | Condition | SNOMED     |
| 43530745   | Asthma with irreversible airway obstruction             | Clinical Finding | Condition | SNOMED     |
| 44805087   | Asthma causes night time symptoms 1 to 2 times per week | Clinical Finding | Condition | SNOMED     |
| 44805089   | Asthma causes symptoms most nights                      | Clinical Finding | Condition | SNOMED     |
| 44810117   | Chronic asthma with fixed airflow obstruction           | Clinical Finding | Condition | SNOMED     |
| 45766727   | Allergic asthma due to Dermatophagoides pteronyssinus   | Clinical Finding | Condition | SNOMED     |
| 45766728   | Allergic asthma due to Dermatophagoides farinae         | Clinical Finding | Condition | SNOMED     |
| 45768910   | Uncomplicated asthma                                    | Clinical Finding | Condition | SNOMED     |
| 45768911   | Exacerbation of mild persistent asthma                  | Clinical Finding | Condition | SNOMED     |
| 45768912   | Exacerbation of severe persistent asthma                | Clinical Finding | Condition | SNOMED     |

| Concept ID | Name                                                                                      | Class            | Domain ID | Vocabulary |
|------------|-------------------------------------------------------------------------------------------|------------------|-----------|------------|
| 45768963   | Uncomplicated mild persistent asthma                                                      | Clinical Finding | Condition | SNOMED     |
| 45768964   | Uncomplicated moderate persistent asthma                                                  | Clinical Finding | Condition | SNOMED     |
| 45768965   | Uncomplicated severe persistent asthma                                                    | Clinical Finding | Condition | SNOMED     |
| 45769350   | Acute severe exacerbation of severe persistent asthma                                     | Clinical Finding | Condition | SNOMED     |
| 45769351   | Acute severe exacerbation of moderate persistent asthma                                   | Clinical Finding | Condition | SNOMED     |
| 45769352   | Acute severe exacerbation of mild persistent asthma                                       | Clinical Finding | Condition | SNOMED     |
| 45769438   | Acute severe exacerbation of asthma                                                       | Clinical Finding | Condition | SNOMED     |
| 45769441   | Acute exacerbation of allergic asthma                                                     | Clinical Finding | Condition | SNOMED     |
| 45769442   | Acute severe exacerbation of allergic asthma                                              | Clinical Finding | Condition | SNOMED     |
| 45769443   | Acute severe exacerbation of intrinsic asthma                                             | Clinical Finding | Condition | SNOMED     |
| 45771045   | Acute exacerbation of asthma                                                              | Clinical Finding | Condition | SNOMED     |
| 45772937   | Exacerbation of moderate persistent asthma                                                | Clinical Finding | Condition | SNOMED     |
| 45773005   | Acute exacerbation of intrinsic asthma                                                    | Clinical Finding | Condition | SNOMED     |
| 46269767   | Acute severe exacerbation of asthma co-occurrent with allergic rhinitis                   | Clinical Finding | Condition | SNOMED     |
| 46269770   | Severe persistent allergic asthma                                                         | Clinical Finding | Condition | SNOMED     |
| 46269771   | Acute severe exacerbation of severe persistent asthma co-occurrent with allergic rhinitis | Clinical Finding | Condition | SNOMED     |

| Concept ID | Name                                                                                             | Class            | Domain ID | Vocabulary |
|------------|--------------------------------------------------------------------------------------------------|------------------|-----------|------------|
| 46269772   | Severe persistent allergic asthma controlled                                                     | Clinical Finding | Condition | SNOMED     |
| 46269773   | Severe persistent asthma controlled co-occurrent with allergic rhinitis                          | Clinical Finding | Condition | SNOMED     |
| 46269774   | Severe persistent allergic asthma uncontrolled                                                   | Clinical Finding | Condition | SNOMED     |
| 46269775   | Severe persistent asthma uncontrolled co-occurrent with allergic rhinitis                        | Clinical Finding | Condition | SNOMED     |
| 46269776   | Mild persistent allergic asthma                                                                  | Clinical Finding | Condition | SNOMED     |
| 46269777   | Acute severe exacerbation of mild persistent allergic asthma co-occurrent with allergic rhinitis | Clinical Finding | Condition | SNOMED     |
| 46269778   | Mild persistent asthma controlled                                                                | Clinical Finding | Condition | SNOMED     |
| 46269779   | Mild persistent asthma controlled co-occurrent with allergic rhinitis                            | Clinical Finding | Condition | SNOMED     |
| 46269780   | Mild persistent allergic asthma uncontrolled                                                     | Clinical Finding | Condition | SNOMED     |
| 46269781   | Mild persistent asthma uncontrolled                                                              | Clinical Finding | Condition | SNOMED     |
| 46269782   | Mild persistent asthma uncontrolled co-occurrent with allergic rhinitis                          | Clinical Finding | Condition | SNOMED     |
| 46269783   | Moderate persistent asthma controlled                                                            | Clinical Finding | Condition | SNOMED     |
| 46269784   | Moderate persistent allergic asthma                                                              | Clinical Finding | Condition | SNOMED     |
| 46269785   | Acute severe exacerbation of moderate persistent asthma co-occurrent with allergic rhinitis      | Clinical Finding | Condition | SNOMED     |
| 46269786   | Moderate persistent allergic asthma controlled                                                   | Clinical Finding | Condition | SNOMED     |

| Concept ID | Name                                                                              | Class            | Domain ID | Vocabulary |
|------------|-----------------------------------------------------------------------------------|------------------|-----------|------------|
| 46269787   | Moderate persistent controlled asthma<br>co-occurrent with allergic rhinitis      | Clinical Finding | Condition | SNOMED     |
| 46269788   | Moderate persistent allergic asthma<br>uncontrolled                               | Clinical Finding | Condition | SNOMED     |
| 46269789   | Moderate persistent asthma<br>uncontrolled co-occurrent with allergic<br>rhinitis | Clinical Finding | Condition | SNOMED     |
| 46269790   | Moderate persistent asthma<br>uncontrolled                                        | Clinical Finding | Condition | SNOMED     |
| 46269802   | Chronic obstructive asthma co-occurrent<br>with acute exacerbation of asthma      | Clinical Finding | Condition | SNOMED     |
| 46270028   | Severe persistent asthma co-occurrent<br>with allergic rhinitis                   | Clinical Finding | Condition | SNOMED     |
| 46270029   | Mild persistent asthma co-occurrent<br>with allergic rhinitis                     | Clinical Finding | Condition | SNOMED     |
| 46270030   | Intermittent asthma co-occurrent with<br>allergic rhinitis                        | Clinical Finding | Condition | SNOMED     |
| 46270082   | Acute exacerbation of mild persistent<br>asthma                                   | Clinical Finding | Condition | SNOMED     |
| 46270322   | Intermittent asthma uncontrolled                                                  | Clinical Finding | Condition | SNOMED     |
| 46270573   | Intermittent asthma well controlled                                               | Clinical Finding | Condition | SNOMED     |
| 46273452   | Acute exacerbation of asthma co-<br>occurrent with allergic rhinitis              | Clinical Finding | Condition | SNOMED     |
| 46273454   | Moderate persistent asthma co-<br>occurrent with allergic rhinitis                | Clinical Finding | Condition | SNOMED     |
| 46273462   | Acute severe exacerbation of moderate<br>persistent allergic asthma               | Clinical Finding | Condition | SNOMED     |

| Concept ID | Name                                                           | Class            | Domain ID | Vocabulary |
|------------|----------------------------------------------------------------|------------------|-----------|------------|
| 46273487   | Acute exacerbation of moderate persistent asthma               | Clinical Finding | Condition | SNOMED     |
| 46273635   | Steroid dependent asthma                                       | Clinical Finding | Condition | SNOMED     |
| 46274059   | Acute severe exacerbation of severe persistent allergic asthma | Clinical Finding | Condition | SNOMED     |
| 46274060   | Mild persistent allergic asthma controlled                     | Clinical Finding | Condition | SNOMED     |
| 46274124   | Acute severe exacerbation of mild persistent allergic asthma   | Clinical Finding | Condition | SNOMED     |
| 46287068   | At risk of severe asthma exacerbation                          | Clinical Finding | Condition | SNOMED     |
| 4057952    | Meat-wrappers' asthma                                          | Clinical Finding | Condition | SNOMED     |
| 4080516    | Printers' asthma                                               | Clinical Finding | Condition | SNOMED     |
| 4119300    | Colophony asthma                                               | Clinical Finding | Condition | SNOMED     |

Table E5: Code list for COPD\*\*.

| Concept ID | Name                                                                       | Class            | Domain ID | Vocabulary |
|------------|----------------------------------------------------------------------------|------------------|-----------|------------|
| 255573     | Chronic obstructive lung disease                                           | Clinical Finding | Condition | SNOMED     |
| 257004     | Acute exacerbation of chronic obstructive airways disease                  | Clinical Finding | Condition | SNOMED     |
| 36685451   | GOLD (Global Initiative for Chronic Obstructive Lung Disease) 2017 group A | Clinical Finding | Condition | SNOMED     |
| 36685452   | GOLD (Global Initiative for Chronic Obstructive Lung Disease) 2017 group B | Clinical Finding | Condition | SNOMED     |
| 36685453   | GOLD (Global Initiative for Chronic Obstructive Lung Disease) 2017 group C | Clinical Finding | Condition | SNOMED     |
| 36685454   | GOLD (Global Initiative for Chronic Obstructive Lung Disease) 2017 group D | Clinical Finding | Condition | SNOMED     |



| Concept ID | Name                                                                                   | Class            | Domain ID | Vocabulary |
|------------|----------------------------------------------------------------------------------------|------------------|-----------|------------|
| 36685455   | GOLD (Global Initiative for Chronic Obstructive Lung Disease) 2017 spirometric grade 1 | Clinical Finding | Condition | SNOMED     |
| 36685456   | GOLD (Global Initiative for Chronic Obstructive Lung Disease) 2017 spirometric grade 2 | Clinical Finding | Condition | SNOMED     |
| 36685457   | GOLD (Global Initiative for Chronic Obstructive Lung Disease) 2017 spirometric grade 3 | Clinical Finding | Condition | SNOMED     |
| 36685458   | GOLD (Global Initiative for Chronic Obstructive Lung Disease) 2017 spirometric grade 4 | Clinical Finding | Condition | SNOMED     |
| 4046986    | End stage chronic obstructive airways disease                                          | Clinical Finding | Condition | SNOMED     |
| 4110056    | Chronic obstructive pulmonary disease with acute lower respiratory infection           | Clinical Finding | Condition | SNOMED     |
| 4115044    | Acute infective exacerbation of chronic obstructive airways disease                    | Clinical Finding | Condition | SNOMED     |
| 4193588    | Moderate chronic obstructive pulmonary disease                                         | Clinical Finding | Condition | SNOMED     |
| 4196712    | Mild chronic obstructive pulmonary disease                                             | Clinical Finding | Condition | SNOMED     |
| 4209097    | Severe chronic obstructive pulmonary disease                                           | Clinical Finding | Condition | SNOMED     |
| 44782563   | Pulmonary hypertension due to chronic obstructive pulmonary disease                    | Clinical Finding | Condition | SNOMED     |
| 44788819   | Mult COPD emerg hosp admission                                                         | Clinical Finding | Condition | SNOMED     |

| Concept ID | Name                                                                      | Class            | Domain ID | Vocabulary |
|------------|---------------------------------------------------------------------------|------------------|-----------|------------|
| 44791725   | Very severe chronic obstructive pulmonary disease                         | Clinical Finding | Condition | SNOMED     |
| 44807895   | Acute non-infective exacerbation of chronic obstructive pulmonary disease | Clinical Finding | Condition | SNOMED     |
| 46269701   | Chronic obstructive lung disease co-occurrent with acute bronchitis       | Clinical Finding | Condition | SNOMED     |

### Online Supplement 3 – Respiratory drug classes

#### Initial Event Cohort:

People with continuous observation of 0 days before and 0 days after event may enter the cohort when observing any of the following:

- Drug exposure of drug class\*.

Cohort Exit: If the index event is found within an era, the cohort end date will use the era's end date. Otherwise, it will use the observation period end date that contains the index event.

Table E6: Drug classes\* are defined by the following ingredients and dose forms.

| Drug class | ATC code | Ingredient     | Concept ID | DDD      | Included dose forms          |
|------------|----------|----------------|------------|----------|------------------------------|
| ICS        | R03BA01  | beclomethasone | 1115572    | 800 mcg  | Inhalant, Inhalation Powder, |
|            | R03BA02  | budesonide     | 939259     | 800 mcg  | Inhalation Solution,         |
|            | R03BA03  | flunisolide    | 1196514    | 1000 mcg | Inhalation Spray, Inhalation |
|            | R03BA05  | fluticasone    | 1149380    | 600 mcg  | Suspension, Metered Dose     |

|      |         |                                        |                                               |             |                              |
|------|---------|----------------------------------------|-----------------------------------------------|-------------|------------------------------|
|      | R03BA07 | mometasone                             | 905233                                        | 400 mcg     | Inhaler, Dry Powder Inhaler, |
|      | R03BA08 | ciclesonide                            | 902938                                        | 160 mcg     | Gas for Inhalation           |
|      | R03BA04 | betamethasone                          | 920458                                        | Not defined |                              |
|      | R03BA06 | triamcinolone                          | 903963                                        | Not defined |                              |
|      | R03BA09 | fluticasone furoate                    | Not available<br>(falls under<br>fluticasone) | Not defined |                              |
| SABA | R03AC02 | salbutamol/albuterol                   | 1154343                                       | 800 mcg     | Inhalant, Inhalation Powder, |
|      | R03AC03 | terbutaline                            | 1236744                                       | 2000 mcg    | Inhalation Solution,         |
|      | R03AC04 | fenoterol                              | 19053979                                      | 600 mcg     | Inhalation Spray, Inhalation |
|      | R03AC05 | rimiterol                              | 19063387                                      | 1600 mcg    | Suspension, Metered Dose     |
|      | R03AC06 | hexoprenaline                          | 19068969                                      | 1500 mcg    | Inhaler, Dry Powder Inhaler, |
|      | R03AC07 | isoetharine                            | 1181809                                       | Not defined | Gas for Inhalation           |
|      | R03AC08 | pirbuterol                             | 1125449                                       | 1200 mcg    |                              |
|      | R03AC09 | trimetoquinol<br>hydrochloride hydrate | 35198052                                      | Not defined |                              |
|      | R03AC10 | carbuterol                             | 40798689                                      | Not defined |                              |
|      | R03AC15 | reproterol                             | 19035396                                      | Not defined |                              |
|      | R03AC16 | procaterol                             | 19028950                                      | 60 mcg      |                              |
|      | R03AC17 | bitolterol                             | 1138050                                       | Not defined |                              |
| LABA | R03AC11 | tulobuterol                            | 19043191                                      | 1600 mcg    | Inhalant, Inhalation Powder, |
|      | R03AC12 | salmeterol                             | 1137529                                       | 100 mcg     | Inhalation Solution,         |
|      | R03AC13 | formoterol                             | 1196677                                       | 24 mcg      | Inhalation Spray, Inhalation |
|      | R03AC14 | clenbuterol                            | 19097824                                      | Not defined | Suspension, Metered Dose     |
|      | R03AC18 | indacaterol                            | 40240664                                      | 150 mcg     | Inhaler, Dry Powder Inhaler, |
|      | R03AC19 | olodaterol                             | 45775116                                      | 5 mcg       | Gas for Inhalation           |

|      |               |                    |          |                                                                  |                                                                                                                                                                                    |
|------|---------------|--------------------|----------|------------------------------------------------------------------|------------------------------------------------------------------------------------------------------------------------------------------------------------------------------------|
|      | Not available | vilanterol         | 43532539 | Not defined                                                      |                                                                                                                                                                                    |
| SAMA | R03BB01       | ipratropium        | 1112921  | 120 mcg                                                          | Inhalant, Inhalation Powder,                                                                                                                                                       |
|      | R03BB02       | oxitropium         | 19018882 | 600 mcg for inhalation aerosol, 4000 mcg for inhalation solution | Inhalation Solution, Inhalation Spray, Inhalation Suspension, Metered Dose Inhaler, Dry Powder Inhaler, Gas for Inhalation                                                         |
| LAMA | R03BB04       | tiotropium         | 1106776  | 10 mcg (soft mist inhaler)                                       | Inhalant, Inhalation Powder, (DPI) Inhalation Solution, Inhalation Spray, Inhalation Suspension, Metered Dose Inhaler, Dry Powder Inhaler,                                         |
|      | R03BB05       | aclidinium         | 42873639 | 644 mcg                                                          | Gas for Inhalation                                                                                                                                                                 |
|      | R03BB06       | glycopyrronium     | 45775571 | 44 mcg                                                           |                                                                                                                                                                                    |
|      | R03BB07       | umeclidinium       | 44785907 | 55 mcg                                                           |                                                                                                                                                                                    |
| LTRA | R03DC01       | zafirlukast        | 1111706  | 40 mg                                                            | Buccal Tablet, Delayed                                                                                                                                                             |
|      | R03DC02       | pranlukast hydrate | 43009065 | Not defined                                                      | Release Oral Tablet,                                                                                                                                                               |
|      | R03DC03       | montelukast        | 1154161  | 10 mg                                                            | Disintegrating Oral Tablet,                                                                                                                                                        |
|      | R03DC04       | ibudilast          | 43009091 | Not defined                                                      | Chewable Tablet, Delayed Release Oral Capsule, Extended Release Oral Tablet, Extended Release Suspension, Oral Capsule, Oral Gel, Oral Granules, Oral Lozenge, Oral Ointment, Oral |

|           |         |                          |               |             |                                                                                                                                                                                                           |
|-----------|---------|--------------------------|---------------|-------------|-----------------------------------------------------------------------------------------------------------------------------------------------------------------------------------------------------------|
|           |         |                          |               |             | Paste, Oral Powder, Oral Solution, Oral Suspension, Effervescent Oral Tablet, Extended Release Oral Capsule, Powder for Oral Suspension, Sublingual Tablet, Tablet for Oral Suspension, Oral Tablet, Pack |
| Xanthines | R03DA01 | diprophylline/dyphylline | 1140088       | 1 g         | Buccal Tablet, Delayed Release Oral Tablet,                                                                                                                                                               |
|           | R03DA02 | choline theophyllinate   | 1195334       | 600 mg      | Disintegrating Oral Tablet,                                                                                                                                                                               |
|           | R03DA03 | proxiphylline            | 19029547      | 1.2 g       | Chewable Tablet, Delayed                                                                                                                                                                                  |
|           | R03DA04 | theophylline             | 1237049       | 400 mg      | Release Oral Capsule,                                                                                                                                                                                     |
|           | R03DA05 | aminophylline            | 1105775       | 600 mg      | Extended Release Oral                                                                                                                                                                                     |
|           | R03DA06 | etamiphyllin             | 40798802      | Not defined | Tablet, Extended Release                                                                                                                                                                                  |
|           | R03DA07 | theobromine              | 19137056      | Not defined | Suspension, Oral Capsule,                                                                                                                                                                                 |
|           | R03DA08 | bamifylline              | 19018518      | Not defined | Oral Gel, Oral Granules, Oral                                                                                                                                                                             |
|           | R03DA09 | acefylline piperazine    | 40798596      | Not defined | Lozenge, Oral Ointment, Oral                                                                                                                                                                              |
|           | R03DA10 | bufylline                | Not available | Not defined | Paste, Oral Powder, Oral Solution, Oral Suspension,                                                                                                                                                       |
|           | R03DA11 | doxofylline              | 43009019      | 800 mg      | Effervescent Oral Tablet, Extended Release Oral Capsule, Powder for Oral Suspension, Sublingual Tablet, Tablet for Oral Suspension, Oral Tablet, Pack                                                     |

|              |         |                    |          |             |                               |
|--------------|---------|--------------------|----------|-------------|-------------------------------|
| Systemic     | H02AB01 | betamethasone      | 920458   | 1.5 mg      | Injectable Solution,          |
| glucocortico | H02AB02 | dexamethasone      | 1518254  | 1.5 mg      | Injectable Suspension, Auto-  |
| steroids     | H02AB03 | fluocortolone      | 19055344 | 10 mg       | Injector, Intravenous         |
|              | H02AB04 | methylprednisolone | 1506270  | 7.5 mg      | Solution, Prefilled Syringe,  |
|              | H02AB05 | paramethasone      | 19027186 | 4 mg        | Injection, Intramuscular      |
|              | H02AB06 | prednisolone       | 1550557  | 10 mg       | Solution, Buccal Tablet,      |
|              | H02AB07 | prednisone         | 1551099  | 10 mg       | Delayed Release Oral Tablet,  |
|              | H02AB08 | triamcinolone      | 903963   | 7.5 mg      | Disintegrating Oral Tablet,   |
|              | H02AB09 | hydrocortisone     | 975125   | 30 mg       | Chewable Tablet, Delayed      |
|              | H02AB10 | cortisone          | 1507705  | 37.5 mg     | Release Oral Capsule,         |
|              | H02AB11 | prednylidene       | 19011127 | 12 mg       | Extended Release Oral         |
|              | H02AB12 | rimexolone         | 977421   | Not defined | Tablet, Extended Release      |
|              | H02AB13 | deflazacort        | 19086888 | 15 mg       | Suspension, Oral Capsule,     |
|              | H02AB14 | cloprednol         | 19050907 | Not defined | Oral Gel, Oral Granules, Oral |
|              | H02AB15 | meprednisone       | 19009116 | Not defined | Lozenge, Oral Ointment, Oral  |
|              | H02AB17 | cortivazol         | 19061907 | Not defined | Paste, Oral Powder, Oral      |
|              | H02AB90 | flumetasone        | 19055156 | Not defined | Solution, Oral Suspension,    |
|              |         |                    |          |             | Effervescent Oral Tablet,     |
|              |         |                    |          |             | Extended Release Oral         |
|              |         |                    |          |             | Capsule, Powder for Oral      |
|              |         |                    |          |             | Suspension, Sublingual        |
|              |         |                    |          |             | Tablet, Tablet for Oral       |
|              |         |                    |          |             | Suspension, Oral Tablet,      |
|              |         |                    |          |             | Pack                          |
| Anti-IgE     | R03DX05 | omalizumab         | 1110942  | 16 mg       | Injectable Solution,          |
|              |         |                    |          |             | Injectable Suspension, Auto-  |
|              |         |                    |          |             | Injector, Intravenous         |
|              |         |                    |          |             | Solution, Prefilled Syringe,  |

|                    |         |              |          |         |                                                                                                                                                                                                                                                                                                                                                                                                       |
|--------------------|---------|--------------|----------|---------|-------------------------------------------------------------------------------------------------------------------------------------------------------------------------------------------------------------------------------------------------------------------------------------------------------------------------------------------------------------------------------------------------------|
|                    |         |              |          |         | Injection, Intramuscular<br>Solution                                                                                                                                                                                                                                                                                                                                                                  |
| Anti-IL4R $\alpha$ | D11AH05 | dupilumab    | 1593467  | 21.4 mg | Injectable Solution,<br>Injectable Suspension, Auto-<br>Injector, Intravenous<br>Solution, Prefilled Syringe,<br>Injection, Intramuscular<br>Solution                                                                                                                                                                                                                                                 |
| Anti-IL5(R)        | R03DX08 | reslizumab   | 35603983 | 7.1 mg  | Injectable Solution,                                                                                                                                                                                                                                                                                                                                                                                  |
|                    | R03DX09 | mepolizumab  | 35606631 | 3.6 mg  | Injectable Suspension, Auto-<br>Injector, Intravenous                                                                                                                                                                                                                                                                                                                                                 |
|                    | R03DX10 | benralizumab | 792993   | 0.54 mg | Solution, Prefilled Syringe,<br>Injection, Intramuscular<br>Solution                                                                                                                                                                                                                                                                                                                                  |
| PDE4               | R03DX07 | roflumilast  | 40236897 | 500 mcg | Buccal Tablet, Delayed<br>Release Oral Tablet,<br>Disintegrating Oral Tablet,<br>Chewable Tablet, Delayed<br>Release Oral Capsule,<br>Extended Release Oral<br>Tablet, Extended Release<br>Suspension, Oral Capsule,<br>Oral Gel, Oral Granules, Oral<br>Lozenge, Oral Ointment, Oral<br>Paste, Oral Powder, Oral<br>Solution, Oral Suspension,<br>Effervescent Oral Tablet,<br>Extended Release Oral |

Capsule, Powder for Oral  
Suspension, Sublingual  
Tablet, Tablet for Oral  
Suspension, Oral Tablet,  
Pack



Online Supplement 4 – Baseline characteristics

Table E7: Code list of baseline characteristics.

| Name                                                                                    | Concept IDs (any time prior to first diagnosis)                                                                                                                                                                                                                |
|-----------------------------------------------------------------------------------------|----------------------------------------------------------------------------------------------------------------------------------------------------------------------------------------------------------------------------------------------------------------|
| Sex (Male)                                                                              | x                                                                                                                                                                                                                                                              |
| Age (in years)                                                                          | x                                                                                                                                                                                                                                                              |
| Charlson comorbidity index score                                                        | x                                                                                                                                                                                                                                                              |
| Anxiety                                                                                 | 441542                                                                                                                                                                                                                                                         |
| Allergic rhinitis                                                                       | 257007                                                                                                                                                                                                                                                         |
| Atopic disorders                                                                        | 133834                                                                                                                                                                                                                                                         |
| Cerebrovascular disease (stroke and/or TIA)                                             | 381591                                                                                                                                                                                                                                                         |
| Chronic rhinosinusitis (allergic fungal sinusitis, chronic rhinitis, chronic sinusitis) | 132932,134661,134668,139841,257012,259848,761761,761762,765276,4048184,4048185,4051475,4051486,4051487,4051488,4110027,4110489,4110490,4112365,4112367,4112497,4112498,4112529,4145495,4173466,4179673,4181738,4230641,4247588,4288156,4316066,4316067,4322228 |
| Depressive disorder                                                                     | 440383                                                                                                                                                                                                                                                         |
| Diabetes mellitus (type I and II)                                                       | 201820                                                                                                                                                                                                                                                         |
| Gastroesophageal reflux disease                                                         | 318800,765110,4046097,4076267,4144111,4159148,4159156,36687117,36712768,36712969,36713492,36713493,42535063                                                                                                                                                    |
| Heart failure                                                                           | 316139                                                                                                                                                                                                                                                         |
| Hypertensive disorder                                                                   | 316866                                                                                                                                                                                                                                                         |
| Ischemic heart disease (angina pectoris and/or myocardial infarction)                   | 4185932                                                                                                                                                                                                                                                        |
| Lower Respiratory Tract Infection (previous year)                                       | 4028876                                                                                                                                                                                                                                                        |
| Nasal polyposis                                                                         | 42537251                                                                                                                                                                                                                                                       |
| Obesity                                                                                 | 433736                                                                                                                                                                                                                                                         |

Details of Concept IDs can be found on <https://athena.ohdsi.org/>.

Online Supplement 5 – Study settings treatment trajectories

Table E8: Study settings treatment trajectories.

| General settings                  |                                                                                                                                           |                                           |
|-----------------------------------|-------------------------------------------------------------------------------------------------------------------------------------------|-------------------------------------------|
| studyName                         | Unique name identifying the set of study parameters below                                                                                 | Main analysis                             |
| targetCohortId                    | Select one study population                                                                                                               | Asthma or COPD                            |
| eventCohortIds                    | Select all treatments of interest                                                                                                         | All respiratory drug classes <sup>1</sup> |
| Analysis settings                 |                                                                                                                                           |                                           |
| includeTreatments<br>PriorToIndex | Number of days prior to the index date of the target cohort that event cohorts are allowed to start                                       | 0 <sup>2</sup>                            |
| minEraDuration                    | Minimum time an event era should last to be included in analysis                                                                          | 5 <sup>3</sup>                            |
| splitEventCohorts                 | Specify event cohort to split in acute (< 30 days) and therapy (≥ 30 days)                                                                | Systemic glucocorticoids                  |
| eraCollapseSize                   | Window of time between which two eras of the same event cohort are collapsed into one era                                                 | 30                                        |
| combinationWindow                 | Window of time two event cohorts need to overlap to be considered a combination treatment                                                 | 30                                        |
| minStepDuration                   | Minimum time an event era before or after a generated combination treatment should last to be included in analysis                        | 30                                        |
| filterTreatments                  | Select first occurrences of / changes between / all event cohorts                                                                         | Changes                                   |
| Output settings                   |                                                                                                                                           |                                           |
| maxPathLength                     | Maximum number of steps included in treatment trajectory                                                                                  | 5                                         |
| minCellCount                      | Minimum number of persons with a specific treatment trajectory for the trajectory to be included in analysis                              | 5                                         |
| minCellMethod                     | Select to completely remove / sequentially adjust (by removing last step as often as necessary) treatment trajectories below minCellCount | Adjust                                    |
| groupCombinations                 | Select to group all non-fixed combinations in one category 'other' in the sunburst plot                                                   | 10                                        |
| addNoPaths                        | Select to include untreated persons without treatment trajectory in the sunburst plot                                                     | TRUE                                      |

<sup>1</sup> Sensitivity analysis 1) restricting to inhaled medications only<sup>2</sup> Sensitivity analysis 2) including respiratory drugs initiated up to 30 days before the first diagnosis<sup>3</sup> Sensitivity analysis 3) lifting the criterium that drug eras should last at least 5 days

Online Supplement 6 – Step-wise treatment

We labelled switches between treatments with two definitions:

1. *A strict definition* following clinical guideline recommendations. Categorizing switches in treatments conform the list of possibilities below (if a switch is not included it is marked as ‘Not according to guidelines’). This results in a clean definition, but leads to undefined switches due to heterogeneity of observational data.

Table E9: Definition following GINA guidelines [1] – Asthma.

| From     | To                                             | Label   |
|----------|------------------------------------------------|---------|
| SABA     | SABA+SAMA                                      | step up |
| SABA     | ICS+SABA                                       | step up |
| SABA     | ICS                                            | step up |
| SABA     | LTRA                                           | step up |
| SAMA     | SABA+SAMA                                      | step up |
| SAMA     | ICS+SABA                                       | step up |
| SAMA     | ICS                                            | step up |
| SAMA     | LTRA                                           | step up |
| ICS      | ICS+LABA                                       | step up |
| ICS      | ICS+LAMA                                       | step up |
| ICS      | ICS+LTRA                                       | step up |
| ICS+LABA | ICS+LABA+LAMA                                  | step up |
| ICS+LABA | ICS+LABA+Systemic glucocorticoids<br>(therapy) | step up |
| ICS+LABA | Anti-IgE+ICS+LABA                              | step up |
| ICS+LABA | Anti-IL5(R)+ICS+LABA                           | step up |
| ICS+LABA | Anti-IL4R $\alpha$ +ICS+LABA                   | step up |

|                                                |                                                |           |
|------------------------------------------------|------------------------------------------------|-----------|
| ICS+LTRA                                       | ICS+LABA+LAMA                                  | step up   |
| ICS+LTRA                                       | ICS+LABA+LAMA                                  | step up   |
| ICS+LTRA                                       | ICS+LABA+Systemic glucocorticoids<br>(therapy) | step up   |
| ICS+LTRA                                       | Anti-IgE+ICS+LABA                              | step up   |
| ICS+LTRA                                       | Anti-IL5(R)+ICS+LABA                           | step up   |
| ICS+LTRA                                       | Anti-IL4R $\alpha$ +ICS+LABA                   | step up   |
| SABA                                           | SAMA                                           | switching |
| SAMA                                           | SABA                                           | switching |
| ICS                                            | LTRA                                           | switching |
| LTRA                                           | ICS                                            | switching |
| ICS+LABA                                       | ICS+LTRA                                       | switching |
| ICS+LTRA                                       | ICS+LABA                                       | switching |
| ICS+LABA                                       | ICS+LAMA                                       | switching |
| ICS+LAMA                                       | ICS+LABA                                       | switching |
| ICS+LABA+LAMA                                  | ICS+LABA+Systemic glucocorticoids<br>(therapy) | switching |
| ICS+LABA+LAMA                                  | Anti-IgE+ICS+LABA                              | switching |
| ICS+LABA+LAMA                                  | Anti-IL5(R)+ICS+LABA                           | switching |
| ICS+LABA+LAMA                                  | Anti-IL4R $\alpha$ +ICS+LABA                   | switching |
| ICS+LABA+Systemic glucocorticoids<br>(therapy) | ICS+LABA+LAMA                                  | switching |
| ICS+LABA+Systemic glucocorticoids<br>(therapy) | Anti-IgE+ICS+LABA                              | switching |
| ICS+LABA+Systemic glucocorticoids<br>(therapy) | Anti-IL5(R)+ICS+LABA                           | switching |
| ICS+LABA+Systemic glucocorticoids<br>(therapy) | Anti-IL4R $\alpha$ +ICS+LABA                   | switching |

|                                                |                                                |           |
|------------------------------------------------|------------------------------------------------|-----------|
| Anti-IgE+ICS+LABA                              | ICS+LABA+Systemic glucocorticoids<br>(therapy) | switching |
| Anti-IgE+ICS+LABA                              | Anti-IL5(R)+ICS+LABA                           | switching |
| Anti-IgE+ICS+LABA                              | Anti-IL4R $\alpha$ +ICS+LABA                   | switching |
| Anti-IL5(R)+ICS+LABA                           | ICS+LABA+LAMA                                  | switching |
| Anti-IL5(R)+ICS+LABA                           | Anti-IgE+ICS+LABA                              | switching |
| Anti-IL5(R)+ICS+LABA                           | Anti-IL4R $\alpha$ +ICS+LABA                   | switching |
| Anti-IL4R $\alpha$ +ICS+LABA                   | ICS+LABA+Systemic glucocorticoids<br>(therapy) | switching |
| Anti-IL4R $\alpha$ +ICS+LABA                   | ICS+LABA+LAMA                                  | switching |
| Anti-IL4R $\alpha$ +ICS+LABA                   | Anti-IgE+ICS+LABA                              | switching |
| Anti-IL4R $\alpha$ +ICS+LABA                   | Anti-IL5(R)+ICS+LABA                           | switching |
| SABA+SAMA                                      | SABA                                           | step down |
| ICS+SABA                                       | SABA                                           | step down |
| ICS                                            | SABA                                           | step down |
| LTRA                                           | SABA                                           | step down |
| SABA+SAMA                                      | SAMA                                           | step down |
| ICS+SABA                                       | SAMA                                           | step down |
| ICS                                            | SAMA                                           | step down |
| LTRA                                           | SAMA                                           | step down |
| ICS+LABA                                       | ICS                                            | step down |
| ICS+LAMA                                       | ICS                                            | step down |
| ICS+LTRA                                       | ICS                                            | step down |
| ICS+LABA+LAMA                                  | ICS+LABA                                       | step down |
| ICS+LABA+Systemic glucocorticoids<br>(therapy) | ICS+LABA                                       | step down |
| Anti-IgE+ICS+LABA                              | ICS+LABA                                       | step down |
| Anti-IL5(R)+ICS+LABA                           | ICS+LABA                                       | step down |

|                                                |          |           |
|------------------------------------------------|----------|-----------|
| Anti-IL4R $\alpha$ +ICS+LABA                   | ICS+LABA | step down |
| ICS+LABA+LAMA                                  | ICS+LTRA | step down |
| ICS+LABA+LAMA                                  | ICS+LTRA | step down |
| ICS+LABA+Systemic glucocorticoids<br>(therapy) | ICS+LTRA | step down |
| Anti-IgE+ICS+LABA                              | ICS+LTRA | step down |
| Anti-IL5(R)+ICS+LABA                           | ICS+LTRA | step down |
| Anti-IL4R $\alpha$ +ICS+LABA                   | ICS+LTRA | step down |

Table E10: Definition following GOLD guidelines [2] – COPD.

| From      | To        | Label   |
|-----------|-----------|---------|
| SABA      | SABA+SAMA | step up |
| SABA      | LABA      | step up |
| SABA      | LAMA      | step up |
| SABA      | Xanthines | step up |
| SAMA      | SABA+SAMA | step up |
| SAMA      | LABA      | step up |
| SAMA      | LAMA      | step up |
| SAMA      | Xanthines | step up |
| LABA      | LABA+LAMA | step up |
| LABA      | ICS+LABA  | step up |
| LABA      | ICS+LAMA  | step up |
| LAMA      | LABA+LAMA | step up |
| LAMA      | ICS+LABA  | step up |
| LAMA      | ICS+LAMA  | step up |
| Xanthines | LABA+LAMA | step up |
| Xanthines | ICS+LABA  | step up |
| Xanthines | ICS+LAMA  | step up |

|               |               |           |
|---------------|---------------|-----------|
| LABA+LAMA     | ICS+LABA+LAMA | step up   |
| ICS+LABA      | ICS+LABA+LAMA | step up   |
| ICS+LABA      | ICS+LABA+PDE4 | step up   |
| ICS+LAMA      | ICS+LABA+LAMA | step up   |
| SABA          | SAMA          | switching |
| SAMA          | SABA          | switching |
| LABA          | LAMA          | switching |
| LABA          | Xanthines     | switching |
| LAMA          | LABA          | switching |
| LAMA          | Xanthines     | switching |
| Xanthines     | LABA          | switching |
| Xanthines     | LAMA          | switching |
| LABA+LAMA     | ICS+LABA      | switching |
| LABA+LAMA     | ICS+LAMA      | switching |
| ICS+LABA      | LABA+LAMA     | switching |
| ICS+LABA      | ICS+LAMA      | switching |
| ICS+LAMA      | LABA+LAMA     | switching |
| ICS+LAMA      | ICS+LABA      | switching |
| ICS+LABA+LAMA | ICS+LABA+PDE4 | switching |
| ICS+LABA+PDE4 | ICS+LABA+LAMA | switching |
| SABA+SAMA     | SABA          | step down |
| LABA          | SABA          | step down |
| LAMA          | SABA          | step down |
| Xanthines     | SABA          | step down |
| SABA+SAMA     | SAMA          | step down |
| LABA          | SAMA          | step down |
| LAMA          | SAMA          | step down |
| Xanthines     | SAMA          | step down |

|               |           |           |
|---------------|-----------|-----------|
| LABA+LAMA     | LABA      | step down |
| ICS+LABA      | LABA      | step down |
| ICS+LAMA      | LABA      | step down |
| LABA+LAMA     | LAMA      | step down |
| ICS+LABA      | LAMA      | step down |
| ICS+LAMA      | LAMA      | step down |
| LABA+LAMA     | Xanthines | step down |
| ICS+LABA      | Xanthines | step down |
| ICS+LAMA      | Xanthines | step down |
| ICS+LABA+LAMA | LABA+LAMA | step down |
| ICS+LABA+LAMA | ICS+LABA  | step down |
| ICS+LABA+PDE4 | ICS+LABA  | step down |
| ICS+LABA+LAMA | ICS+LAMA  | step down |

2. A *broad definition* capturing the clinical interpretation of the guidelines. This definition categorizes all possible switches by defining drug class levels and subsequent patient treatment levels (sum of drug class levels received by a patient), see explanation below.

We distinguish the following labels:

- Step up
- Step down
- Switching
- Start of acute exacerbation
- End of acute exacerbation
- No follow-up treatment with a different drug class
- Other (= possibly off-label use)<sup>†</sup>



To categorize the switches each treatment will first receive a score that determines the *patient treatment level*. The patient treatment level is computed by summing the *drug class levels* corresponding to each received treatment at a given point in time (e.g. 'ICS + LABA' = 1 + 2 = Patient treatment level 3). The drug class levels were determined by clinical experts and can be found in Table E11. A higher drug class level indicates medications that are seen as more intensive treatment (relative to others). Table E12 contains examples of resulting patient treatment levels for common asthma treatments.

Table E11: Drug class levels for asthma and COPD.

|                    | For asthma                              | For COPD                                |
|--------------------|-----------------------------------------|-----------------------------------------|
| <b>Level 0</b>     | SABA                                    | SABA                                    |
| <b>(relievers)</b> | SAMA                                    | SAMA                                    |
|                    | Systemic $\beta$ 2 agonist              | Systemic $\beta$ 2 agonist              |
| <b>Level 1</b>     | ICS                                     |                                         |
|                    | LTRA                                    | LABA                                    |
|                    | PDE4 <sup>†</sup>                       | LAMA                                    |
|                    | Xanthines                               | Xanthines                               |
| <b>Level 2</b>     |                                         | ICS                                     |
|                    | LABA <sup>†</sup>                       | LTRA <sup>†</sup>                       |
|                    | LAMA <sup>†</sup>                       | PDE4                                    |
| <b>Level 3</b>     | Systemic glucocorticosteroids (therapy) | Systemic glucocorticosteroids (therapy) |
|                    |                                         | Biologic:                               |
|                    | Biologic: Anti-IL5(R)                   | Anti-IL5(R) <sup>†</sup>                |
|                    |                                         | Anti-IgE <sup>†</sup>                   |



- To 'Systemic glucocorticoids (acute)' -> 'Start of acute exacerbation'
- From 'Systemic glucocorticoids (acute)' -> 'End of acute exacerbation'
- To PDE4, LABA (without ICS), LAMA (without ICS) for asthma -> 'Other'
- To LTRA, Anti-IL5(R), Anti-IgE, Anti-IL4R $\alpha$  for COPD -> 'Other'
- Else -> 'No follow-up treatment with different drug class'

Online Supplement 7 – Results treatment step-up/step-down

The sensitivity analyses using the strict definition of treatment step-up/step-down showed similar patterns for adults with asthma (Table E13) and COPD (Table E14).

Table E13: Percentage of adults with asthma who switched, stepped-down or stepped-up respiratory pharmacological treatment after the first-line treatment (strict definition).

| Label                       | CCAIE<br>(United States) | Medicaid<br>(United States) | Medicare<br>(United States) | EHIF<br>(Estonia) | CPRD<br>(United Kingdom) | SIDIAP<br>(Spain) | IPCI<br>(Netherlands) | AUSOM<br>(South Korea) |
|-----------------------------|--------------------------|-----------------------------|-----------------------------|-------------------|--------------------------|-------------------|-----------------------|------------------------|
| Not according to guidelines | 58.5                     | 54.0                        | 56.5                        | 45.6              | 52.1                     | 62.1              | 46.6                  | 67.6                   |
| Step-up                     | 5.5                      | 5.4                         | 4.4                         | 10.4              | 15.6                     | 8.4               | 8.9                   | 0.9                    |
| Step-down                   | 3.5                      | 2.9                         | 2.6                         | 13.1              | 12.7                     | 7.6               | 5.3                   | 0.09                   |
| Switching                   | 0.4                      | 0.3                         | 0.4                         | 1.0               | 0.4                      | 1.4               | 0.7                   | 0.8                    |
| No follow-up treatment*     | 32.0                     | 37.5                        | 36.0                        | 29.9              | 19.1                     | 20.6              | 38.4                  | 30.6                   |

\* Patients who did not receive medication of a different respiratory drug class after the first treatment, i.e. patients who remained on the same treatment or who discontinued treatment.

Table E14: Percentage of adults with COPD who switched, stepped-down or stepped-up respiratory pharmacological treatment after the first-line treatment (strict definition).

| Label                       | CCAIE<br>(United States) | Medicaid<br>(United States) | Medicare<br>(United States) | EHIF<br>(Estonia) | CPRD<br>(United Kingdom) | SIDIAP<br>(Spain) | IPCI<br>(Netherlands) | AUSOM<br>(South Korea) |
|-----------------------------|--------------------------|-----------------------------|-----------------------------|-------------------|--------------------------|-------------------|-----------------------|------------------------|
| Not according to guidelines | 57.2                     | 57.5                        | 54.1                        | 43.5              | 71.4                     | 65.2              | 56.4                  | 47.3                   |
| Step-up                     | 1.9                      | 3.3                         | 3.0                         | 8.4               | 10.9                     | 8.0               | 10.6                  | 1.1                    |
| Step-down                   | 1.7                      | 2.3                         | 2.2                         | 5.4               | 4.9                      | 4.5               | 5.2                   | 2.6                    |
| Switching                   | 0.3                      | 0.3                         | 0.3                         | 3.6               | 1.3                      | 2.9               | 2.2                   | 6.0                    |
| No follow-up treatment*     | 39.0                     | 36.5                        | 40.4                        | 39.0              | 11.6                     | 19.3              | 25.6                  | 43.0                   |

\* Patients who did not receive medication of a different respiratory drug class after the first treatment, i.e. patients who remained on the same treatment or who discontinued treatment.

Abbreviations: CCAIE = IBM MarketScan® Commercial Claims and Encounters Database, Medicaid = IBM MarketScan® Multi-State Medicaid Database, Medicare = IBM MarketScan® Medicare Supplemental Database, EHIF = Estonian Health Insurance Fund, CPRD = Clinical Practice Research Datalink, SIDIAP = Information System for Research in Primary Care, IPCI = Integrated Primary Care Information, AUSOM = Ajou University School of Medicine.

### Online Supplement 8 – Sensitivity analysis

Since we could not ensure that the moment of diagnosis of asthma or COPD was similar across all databases, care settings, and countries, as this is likely to be influenced by a variety of factors inherent to the different health care systems, we performed three sensitivity analyses for each study population: 1) restricting to inhaled medications only, 2) including respiratory drugs initiated up to 30 days before the first diagnosis, and 3) lifting the criterium that drug eras should last at least 5 days. Results can be explored in can be explored in the interactive online Shiny application: <https://mi-erasmusmc.shinyapps.io/AsthmaCOPDTreatmentPatterns/>. Importantly, these had no significant impact on the observed treatment trajectories.

Furthermore, since differentiating asthma from COPD might be challenging (especially in primary care and at first presentation), we also investigated treatment trajectories in newly diagnosed patients with asthma COPD overlap (ACO).

#### *Study population:*

##### *iii) Asthma-COPD overlap*

#### Initial Event Cohort:

People with continuous observation of 365 days before and 1,095 days after event may enter the cohort when observing any of the following:

- Condition occurrence of COPD\*\* for the first time in the person's history
  - o with at least one condition occurrence of Asthma\* all days before and 0 days after index start date.

- Condition occurrence of Asthma\* for the first time in the person's history
  - o with at least one condition occurrence of COPD\*\* all days before and 0 days after index start date.

Inclusion Criteria:

- Age  $\geq$  40 years AND,
- Index date after December 31, 2009 and before December 31, 2019.

Cohort Exit: the person exits the cohort at the end of continuous observation.

For code lists see Online Supplement 2 for asthma (Table E4) and COPD (Table E5).

*Results:*

Table E15: Baseline characteristics of adults with ACO.

| Characteristic                                                 | CAAE<br>(United<br>States) | Medicaid<br>(United<br>States) | Medicare<br>(United<br>States) | EHIF<br>(Estonia) | CPRD<br>(United<br>Kingdom) | SIDIAP<br>(Spain) | IPCI<br>(Nether<br>lands) | AUSOM<br>(South<br>Korea) |
|----------------------------------------------------------------|----------------------------|--------------------------------|--------------------------------|-------------------|-----------------------------|-------------------|---------------------------|---------------------------|
| Number of patients                                             | 84,171                     | 128,664                        | 67,785                         | 13,182            | 16,606                      | 10,637            | 2,410                     | 552                       |
| Sex: Male, %                                                   | 37.4                       | 28.4                           | 41.4                           | 46                | 45.2                        | 49.8              | 45.5                      | 71.7                      |
| Age at index (years), Mean                                     | 53.9                       | 58.6                           | 75.1                           | 66.5              | 64.3                        | 66.5              | 63.3                      | 65.8                      |
| Charlson Comorbidity Index, Mean                               | 2.6                        | 4.1                            | 4.3                            | 2.7               | 2                           | 2                 | 1.8                       | 2.2                       |
| Common comorbid conditions, % (any time prior first diagnosis) |                            |                                |                                |                   |                             |                   |                           |                           |
| - Anxiety                                                      | 26.2                       | 47.9                           | 15.7                           | 8.3               | 29.8                        | 27                | 22.7                      | 6.2                       |
| - Atopic disorders                                             | 3.4                        | 2.3                            | 3.2                            | 2.3               | 12.2                        | 2.6               | 13.1                      | 2.2                       |
| - Allergic rhinitis                                            | 38.2                       | 29.9                           | 26.8                           | 8.9               | 13.2                        | 12.6              | 18.1                      | 16.3                      |
| - Cerebrovascular disease                                      | 10.8                       | 19.2                           | 34.9                           | 8.5               | 6.3                         | 3.1               | 7.7                       | 4.2                       |
| - Chronic rhinosinusitis                                       | 29.4                       | 20.7                           | 21.6                           | 6.4               | 9.3                         | 1.9               | 15.2                      | 12.7                      |
| - Depressive disorder                                          | 28                         | 53.6                           | 18.6                           | 12.5              | 35.4                        | 18.1              | 20.8                      | 5.4                       |
| - Diabetes mellitus                                            | 27.5                       | 45.3                           | 37.6                           | 16.1              | 12.6                        | 19                | 17.1                      | 15.4                      |
| - Gastroesophageal reflux disease                              | 35.9                       | 54.2                           | 36.6                           | 13.4              | 6                           | 6.6               | 4.7                       | 12.5                      |
| - Heart failure                                                | 8.4                        | 24.5                           | 27                             | 42                | 3.1                         | 6.8               | 6.7                       | 5.4                       |
| - Hypertensive disorder                                        | 62.1                       | 82.4                           | 84.7                           | 36.2              | 38                          | 53.1              | 37.9                      | 44.2                      |
| - Ischemic heart disease                                       | 13.9                       | 22.9                           | 30.9                           | 25.4              | 14                          | 8.4               | 14.4                      | 14                        |
| - Nasal polyposis                                              | 2.2                        | 0.6                            | 1.6                            | 1.6               | 3                           | 2.7               | 0.8                       | 3.4                       |
| - Obesity                                                      | 23.2                       | 36.4                           | 14                             | 15.4              | 7.4                         | 30.8              | 10.2                      | 1.1                       |
| - Lower respiratory tract infections (previous year)           | 45.9                       | 49.4                           | 50.7                           | 38.6              | 6.1                         | 25.2              | 21.7                      | 21.4                      |



Table E16: Number of patients per year with ACO.

| Characteristic | CAAE<br>(United<br>States) | Medicaid<br>(United<br>States) | Medicare<br>(United<br>States) | EHIF<br>(Estonia) | CPRD<br>(United<br>Kingdom) | SIDIAP<br>(Spain) | IPCI<br>(Nether<br>lands) | AUSOM<br>(South<br>Korea) |
|----------------|----------------------------|--------------------------------|--------------------------------|-------------------|-----------------------------|-------------------|---------------------------|---------------------------|
| Year 2010      | 11720                      | 12117                          | 12259                          |                   | 2959                        | 1018              | 261                       | 63                        |
| Year 2011      | 12225                      | 11217                          | 10794                          |                   | 2875                        | 913               | 263                       | 74                        |
| Year 2012      | 9648                       | 10577                          | 10843                          | 3404              | 2515                        | 1211              | 324                       | 55                        |
| Year 2013      | 9556                       | 15748                          | 10410                          | 2704              | 2166                        | 1502              | 387                       | 89                        |
| Year 2014      | 11441                      | 14015                          | 10041                          | 2499              | 1886                        | 1461              | 348                       | 59                        |
| Year 2015      | 10639                      | 21757                          | 5145                           | 2403              | 1714                        | 1414              | 300                       | 44                        |
| Year 2016      | 8717                       | 23581                          | 4194                           | 2172              | 1742                        | 1199              | 345                       | 84                        |
| Year 2017      | 7727                       | 19611                          | 3016                           |                   | 749                         | 1114              | 182                       | 55                        |
| Year 2018+     | 2498                       | 41                             | 1083                           |                   |                             | 805               |                           | 29                        |
| <b>Total</b>   | <b>84,171</b>              | <b>128,664</b>                 | <b>67,785</b>                  | <b>13,182</b>     | <b>16,606</b>               | <b>10,637</b>     | <b>2,410</b>              | <b>552</b>                |

Figure E1: Sunburst plots of adults with ACO showing the first respiratory pharmacological treatment in the center and subsequent pharmacological treatments in the surrounding outer layers. Each color represents a respiratory drug class. A layer with multiple colors indicates a loose combination therapy. The number of patients (N) and percentage of patients treated are indicated for each database.

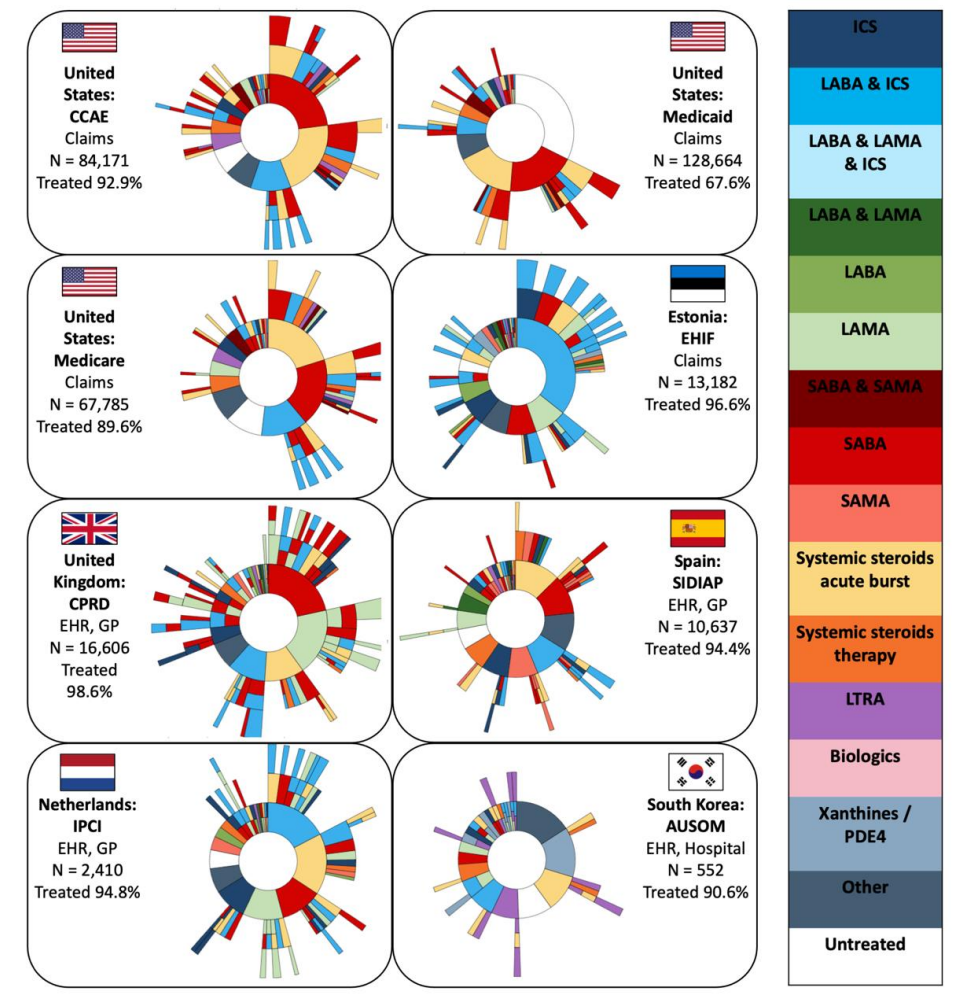

Online Supplement 9 – Pooled results

Figure E2: Pooled sunburst plots of adults with asthma, COPD, and ACO across databases

(left column: Claims United States including CCAE, Medicaid, Medicare and right column: EHR Europe including CPRD, SIDIAP, IPCI).

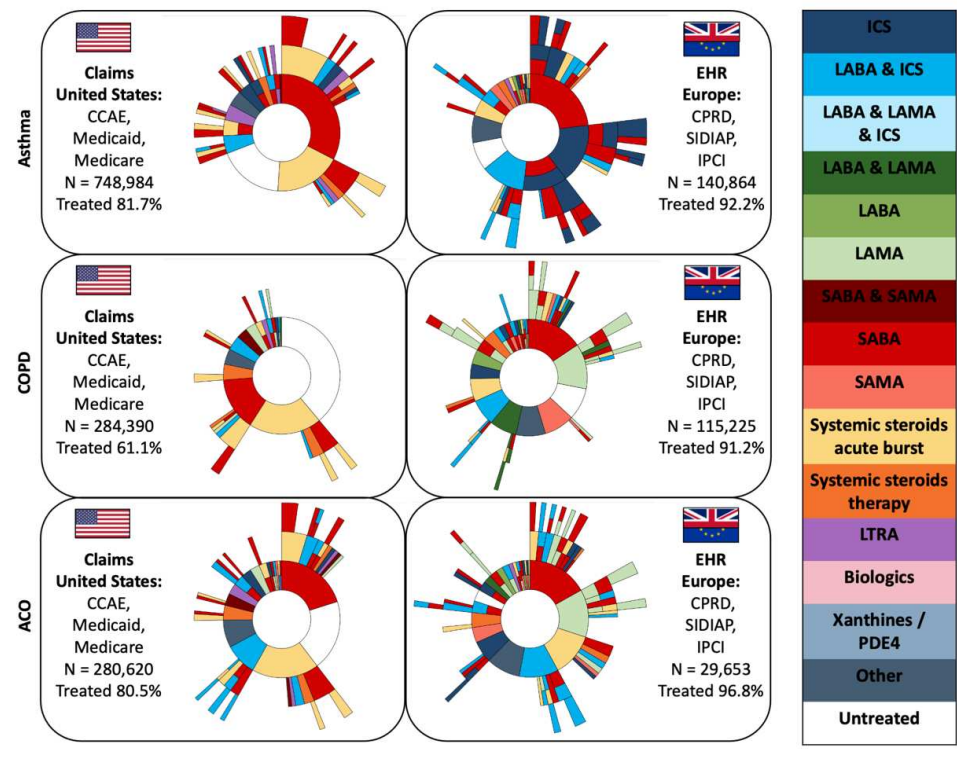

## References

1. Global Initiative for Asthma. Global strategy for asthma management and prevention. 2021 [last accessed 2021 June]; Available from: <https://ginasthma.org/wp-content/uploads/2021/05/GINA-Main-Report-2021-V2-WMS.pdf>
2. Global Initiative for Chronic Obstructive Lung Disease. Global strategy for prevention, diagnosis and management of copd. 2021 [last accessed 2021 June]; Available from: [https://goldcopd.org/wp-content/uploads/2020/11/GOLD-REPORT-2021-v1.1-25Nov20\\_WM.V.pdf](https://goldcopd.org/wp-content/uploads/2020/11/GOLD-REPORT-2021-v1.1-25Nov20_WM.V.pdf)
